# Supplementary material
Source: publisher figshare collection journal article supplement (https://acs.figshare.com/ndownloader/files/4782346)
Supplement: Supplementary file 1 [file 4782346]

data_arc742                                                      
#============================================================= 
# Diffractometer details 
#============================================================= 
_diffrn_measurement_device_type 
; 
Nonius KappaCCD 
; 
_diffrn_radiation_monochromator   graphite 
_computing_data_collection 
; 
KappaCCD software 'Collect' (Nonius, 2000) 
; 
_computing_data_reduction 
; 
KappaCCD software 'DENZO' (Otwinowski & Minor, 1996) 
; 
_computing_cell_refinement 
; 
KappaCCD software 'DENZO' (Otwinowski & Minor, 1996) 
; 
#============================================================= 
# General computing 
#============================================================= 
_computing_structure_refinement 
; 
CRYSTALS (Watkin et al, 2001) 
; 
_computing_publication_material 
; 
CRYSTALS (Watkin et al, 2001) 
; 
_computing_structure_solution     'SIR92 (Giacovazzo et al, 1992)' 
 
 
_chemical_name_systematic         # IUPAC name, in full 
; 
? 
; 
_chemical_melting_point           ? 
_refine_ls_matrix_type            full 
_atom_sites_solution_primary      direct 
_atom_sites_solution_hydrogens    geom 
_refine_ls_hydrogen_treatment     noref 
#============================================================= 
 
_cell_length_a                    19.1714(2)
_cell_angle_alpha                 90
_cell_length_b                    19.1714(2)
_cell_angle_beta                  90
_cell_length_c                    23.3900(3)
_cell_angle_gamma                 90
_cell_volume                      8596.82(17)
 
_symmetry_cell_setting            Tetragonal
_symmetry_space_group_name_H-M    'I 41/a ' 
loop_
 _symmetry_equiv_pos_as_xyz
 'x,y,z'
 '-x,-y,-z'
 'x+1/2,y+1/2,z+1/2'
 '-x+1/2,-y+1/2,-z+1/2'
 '-y+3/4,x+1/4,z+1/4'
 'y+3/4,-x+1/4,-z+1/4'
 '-y+5/4,x+3/4,z+3/4'
 'y+5/4,-x+3/4,-z+3/4'
 '-x+1/2,-y,z+1/2'
 'x+1/2,y,-z+1/2'
 '-x+1,-y+1/2,z+1'
 'x+1,y+1/2,-z+1'
 'y+3/4,-x+3/4,z+3/4'
 '-y+3/4,x+3/4,-z+3/4'
 'y+5/4,-x+5/4,z+5/4'
 '-y+5/4,x+5/4,-z+5/4'
 
loop_
_atom_type_symbol
_atom_type_scat_dispersion_real
_atom_type_scat_dispersion_imag
_atom_type_scat_Cromer_Mann_a1
_atom_type_scat_Cromer_Mann_b1
_atom_type_scat_Cromer_Mann_a2
_atom_type_scat_Cromer_Mann_b2
_atom_type_scat_Cromer_Mann_a3
_atom_type_scat_Cromer_Mann_b3
_atom_type_scat_Cromer_Mann_a4
_atom_type_scat_Cromer_Mann_b4
_atom_type_scat_Cromer_Mann_c
_atom_type_scat_source  
 'C   '    0.0033    0.0016    2.3100   20.8439
    1.0200   10.2075    1.5886    0.5687    0.8650   51.6512    0.2156
'International_Tables_Vol_IV_Table_2.2B'
 'H   '    0.0000    0.0000    0.4930   10.5109
    0.3229   26.1257    0.1402    3.1424    0.0408   57.7998    0.0030
'International_Tables_Vol_IV_Table_2.2B'
 'N   '    0.0061    0.0033   12.2126    0.0057
    3.1322    9.8933    2.0125   28.9975    1.1663    0.5826  -11.5290
'International_Tables_Vol_IV_Table_2.2B'
 'O   '    0.0106    0.0060    3.0485   13.2771
    2.2868    5.7011    1.5463    0.3239    0.8670   32.9089    0.2508
'International_Tables_Vol_IV_Table_2.2B'
 'Os  '   -1.2165    7.6030   28.1894    1.6290
   16.1550    8.9795   14.9305    0.3827    5.6759   48.1647   11.0005
'International_Tables_Vol_IV_Table_2.2B'
 
 
_cell_formula_units_Z                    16
_chemical_formula_sum             ' C22 H30 N2 O2 Os1 '
_chemical_formula_moiety          ' C22 H30 N2 O2 Os1 '
_chemical_compound_source
;
synthesis as described
;
_chemical_formula_weight            544.69
 
 
_cell_measurement_reflns_used        61543
_cell_measurement_theta_min              5
_cell_measurement_theta_max             28
_cell_measurement_temperature          150
 
_exptl_crystal_description        ' fragment ' 
_exptl_crystal_colour             ' dark red ' 
_exptl_crystal_size_min           0.08 
_exptl_crystal_size_mid           0.08 
_exptl_crystal_size_max           0.12 
 
_exptl_crystal_density_diffrn     1.683 
_exptl_crystal_density_meas       ? 
# Non-dispersive F(000): 
_exptl_crystal_F_000              4288 
_exptl_absorpt_coefficient_mu     5.951 
 
_diffrn_measurement_method        \w 
 
_exptl_absorpt_correction_type    multi-scan 
_exptl_absorpt_process_details 
; 
 Denzo/Scalepack (Otwinowski & Minor, 1996) 
; 
_exptl_absorpt_correction_T_min   0.49 
_exptl_absorpt_correction_T_max   0.62 
 
_diffrn_standards_interval_time   0 
_diffrn_standards_interval_count  0 
_diffrn_standards_number          0 
_diffrn_standards_decay_%         0.00 
 
_diffrn_ambient_temperature        150
_diffrn_reflns_number             61543 
_reflns_number_total              4899
#5023 unique reflectyions including absences
_diffrn_reflns_av_R_equivalents   0.081 
 
_diffrn_reflns_theta_min          5.105 
_diffrn_reflns_theta_max          27.491 
_diffrn_measured_fraction_theta_max 1.000 
 
_diffrn_reflns_theta_full         27.491 
_diffrn_measured_fraction_theta_full 1.000 
 
 
_diffrn_reflns_limit_h_min        -24 
_diffrn_reflns_limit_h_max        24 
_diffrn_reflns_limit_k_min        -24 
_diffrn_reflns_limit_k_max        24 
_diffrn_reflns_limit_l_min        -30 
_diffrn_reflns_limit_l_max        30 
_reflns_limit_h_min               -17 
_reflns_limit_h_max               17 
_reflns_limit_k_min               0 
_reflns_limit_k_max               24 
_reflns_limit_l_min               0 
_reflns_limit_l_max               30 
 
 
_refine_diff_density_min          -1.13 
_refine_diff_density_max          1.15 
 
 
_refine_ls_number_reflns          3547 
_refine_ls_number_restraints      0 
_refine_ls_number_parameters      244 
 
#_refine_ls_R_factor_ref 0.0272 
_refine_ls_wR_factor_ref          0.0299 
_refine_ls_goodness_of_fit_ref    1.0711 
 
#_reflns_number_all 4899 
_refine_ls_R_factor_all           0.0431 
_refine_ls_wR_factor_all          0.0510 
 
# The I/u(I) cutoff below was used for refinement as 
# well as the _gt R-factors:
_reflns_threshold_expression      I>3.00u(I)
_reflns_number_gt                 3547 
_refine_ls_R_factor_gt            0.0272 
_refine_ls_wR_factor_gt           0.0299 
 
 
_refine_ls_shift/su_max           0.002355 
_refine_ls_structure_factor_coef  F 
_refine_ls_weighting_scheme       calc 
_refine_ls_weighting_details 
;
 Method, part 1, Chebychev polynomial, (Watkin, 1994, Prince, 1982) 
 [weight] = 1.0/[A~0~*T~0~(x)+A~1~*T~1~(x) ... +A~n-1~]*T~n-1~(x)] 
 where A~i~ are the Chebychev coefficients listed below and x= Fcalc/Fmax 
 Method = Robust Weighting (Prince, 1982) 
 W = [weight] * [1-(deltaF/6*sigmaF)^2^]^2^ 
 A~i~ are: 
 0.235 0.120 0.765E-01 
;
_diffrn_radiation_type            'Mo K\a'
_diffrn_radiation_wavelength           0.71073
 
 

# Uequiv = arithmetic mean of Ui
# i.e. Ueqiv = (U1+U2+U3)/3

# Replace trailing . with the number of unfound
# hydrogen atoms attaced to relavent atom

loop_
_atom_site_label
_atom_site_type_symbol
_atom_site_fract_x
_atom_site_fract_y
_atom_site_fract_z
_atom_site_U_iso_or_equiv
_atom_site_occupancy
_atom_site_adp_type
Os1 Os 0.108654(9) 0.135683(9) 0.388810(7) 0.0270 1.0000 Uani  
O1 O 0.02810(17) 0.14512(19) 0.42046(16) 0.0402 1.0000 Uani  
O2 O 0.11657(19) 0.0980(2) 0.32218(15) 0.0417 1.0000 Uani  
N1 N 0.16052(18) 0.21851(19) 0.39702(15) 0.0248 1.0000 Uani  
C1 C 0.2138(2) 0.2202(2) 0.44280(19) 0.0255 1.0000 Uani  
C2 C 0.2397(2) 0.1450(2) 0.44861(17) 0.0254 1.0000 Uani  
N2 N 0.17811(19) 0.10058(19) 0.43776(16) 0.0279 1.0000 Uani  
C3 C 0.1558(2) 0.2805(2) 0.35806(19) 0.0261 1.0000 Uani  
C4 C 0.1614(3) 0.3491(3) 0.3917(2) 0.0407 1.0000 Uani  
C5 C 0.0866(3) 0.2795(3) 0.3267(2) 0.0374 1.0000 Uani  
C6 C 0.2152(3) 0.2750(3) 0.3149(2) 0.0438 1.0000 Uani  
C7 C 0.1857(2) 0.2486(2) 0.49972(19) 0.0287 1.0000 Uani  
C8 C 0.2337(3) 0.2627(3) 0.5429(2) 0.0371 1.0000 Uani  
C9 C 0.2110(4) 0.2887(3) 0.5956(2) 0.0462 1.0000 Uani  
C10 C 0.1406(4) 0.3007(3) 0.6051(2) 0.0498 1.0000 Uani  
C11 C 0.0939(3) 0.2860(3) 0.5626(3) 0.0497 1.0000 Uani  
C12 C 0.1153(3) 0.2602(3) 0.5099(2) 0.0389 1.0000 Uani  
C13 C 0.1749(2) 0.0306(2) 0.4666(2) 0.0303 1.0000 Uani  
C14 C 0.2399(3) -0.0119(3) 0.4521(3) 0.0533 1.0000 Uani  
C15 C 0.1124(3) -0.0100(3) 0.4451(3) 0.0623 1.0000 Uani  
C16 C 0.1703(5) 0.0421(3) 0.5305(3) 0.0816 1.0000 Uani  
C17 C 0.3009(2) 0.1317(2) 0.40876(19) 0.0280 1.0000 Uani  
C18 C 0.3681(2) 0.1461(2) 0.4288(2) 0.0301 1.0000 Uani  
C19 C 0.4254(2) 0.1433(3) 0.3932(2) 0.0361 1.0000 Uani  
C20 C 0.4171(3) 0.1261(2) 0.3358(2) 0.0355 1.0000 Uani  
C21 C 0.3513(3) 0.1101(3) 0.3157(2) 0.0341 1.0000 Uani  
C22 C 0.2935(2) 0.1132(3) 0.35142(19) 0.0322 1.0000 Uani  
H11 H 0.2524 0.2529 0.4325 0.0306 1.0000 Uiso  
H21 H 0.2588 0.1343 0.4874 0.0304 1.0000 Uiso  
H41 H 0.1582 0.3894 0.3646 0.0488 1.0000 Uiso  
H42 H 0.2072 0.3508 0.4121 0.0488 1.0000 Uiso  
H43 H 0.1226 0.3518 0.4201 0.0488 1.0000 Uiso  
H51 H 0.0836 0.3209 0.3008 0.0448 1.0000 Uiso  
H52 H 0.0476 0.2812 0.3550 0.0448 1.0000 Uiso  
H53 H 0.0829 0.2358 0.3036 0.0448 1.0000 Uiso  
H61 H 0.2135 0.3158 0.2883 0.0526 1.0000 Uiso  
H62 H 0.2609 0.2749 0.3356 0.0526 1.0000 Uiso  
H63 H 0.2103 0.2308 0.2926 0.0526 1.0000 Uiso  
H81 H 0.2845 0.2542 0.5362 0.0445 1.0000 Uiso  
H91 H 0.2457 0.2987 0.6265 0.0554 1.0000 Uiso  
H101 H 0.1243 0.3198 0.6425 0.0597 1.0000 Uiso  
H111 H 0.0431 0.2939 0.5697 0.0597 1.0000 Uiso  
H121 H 0.0801 0.2500 0.4795 0.0467 1.0000 Uiso  
H141 H 0.2373 -0.0583 0.4715 0.0640 1.0000 Uiso  
H142 H 0.2823 0.0137 0.4656 0.0640 1.0000 Uiso  
H143 H 0.2427 -0.0187 0.4098 0.0640 1.0000 Uiso  
H151 H 0.1107 -0.0564 0.4645 0.0748 1.0000 Uiso  
H152 H 0.0688 0.0166 0.4538 0.0748 1.0000 Uiso  
H153 H 0.1165 -0.0168 0.4029 0.0748 1.0000 Uiso  
H161 H 0.1681 -0.0040 0.5504 0.0979 1.0000 Uiso  
H162 H 0.2124 0.0683 0.5438 0.0979 1.0000 Uiso  
H163 H 0.1274 0.0696 0.5396 0.0979 1.0000 Uiso  
H181 H 0.3748 0.1586 0.4700 0.0361 1.0000 Uiso  
H191 H 0.4729 0.1536 0.4086 0.0433 1.0000 Uiso  
H201 H 0.4582 0.1253 0.3094 0.0426 1.0000 Uiso  
H211 H 0.3452 0.0961 0.2748 0.0410 1.0000 Uiso  
H221 H 0.2462 0.1020 0.3359 0.0387 1.0000 Uiso  
loop_
_atom_site_aniso_label
_atom_site_aniso_U_11
_atom_site_aniso_U_22
_atom_site_aniso_U_33
_atom_site_aniso_U_23
_atom_site_aniso_U_13
_atom_site_aniso_U_12
Os1 0.02343(9) 0.03067(10) 0.02681(9) 0.00149(7) -0.00394(6) -0.00451(6) 
O1 0.0223(16) 0.048(2) 0.051(2) 0.0093(17) -0.0028(15) -0.0049(14) 
O2 0.042(2) 0.050(2) 0.0329(18) -0.0036(16) -0.0098(15) -0.0107(17) 
N1 0.0233(17) 0.0273(18) 0.0237(18) 0.0023(14) 0.0010(14) -0.0014(14) 
C1 0.0218(19) 0.026(2) 0.028(2) 0.0001(17) 0.0002(16) -0.0048(16) 
C2 0.023(2) 0.031(2) 0.022(2) 0.0020(17) -0.0045(16) -0.0013(16) 
N2 0.0274(18) 0.0278(19) 0.0283(18) -0.0001(15) -0.0005(15) -0.0017(15) 
C3 0.0223(19) 0.025(2) 0.031(2) 0.0101(17) 0.0009(17) -0.0004(16) 
C4 0.042(3) 0.032(2) 0.048(3) 0.008(2) -0.004(2) 0.000(2) 
C5 0.029(2) 0.043(3) 0.040(3) 0.011(2) -0.003(2) 0.001(2) 
C6 0.027(2) 0.058(3) 0.046(3) 0.024(3) 0.011(2) 0.007(2) 
C7 0.036(2) 0.023(2) 0.027(2) -0.0012(16) 0.0013(18) -0.0009(17) 
C8 0.046(3) 0.035(2) 0.031(2) -0.007(2) -0.005(2) 0.006(2) 
C9 0.078(4) 0.029(2) 0.031(3) -0.008(2) -0.004(3) 0.000(3) 
C10 0.075(4) 0.041(3) 0.033(3) -0.013(2) 0.019(3) -0.013(3) 
C11 0.050(3) 0.042(3) 0.057(4) -0.015(3) 0.027(3) -0.011(2) 
C12 0.033(2) 0.042(3) 0.042(3) -0.014(2) 0.011(2) -0.010(2) 
C13 0.036(2) 0.024(2) 0.031(2) 0.0038(17) 0.0014(19) -0.0015(18) 
C14 0.056(4) 0.032(3) 0.072(4) 0.011(3) 0.011(3) 0.009(2) 
C15 0.059(4) 0.031(3) 0.097(5) 0.019(3) -0.018(4) -0.018(3) 
C16 0.173(9) 0.044(3) 0.027(3) 0.004(3) 0.033(4) -0.029(4) 
C17 0.025(2) 0.029(2) 0.030(2) -0.0006(17) -0.0017(17) 0.0033(16) 
C18 0.025(2) 0.033(2) 0.032(2) 0.0016(18) -0.0029(17) -0.0005(17) 
C19 0.026(2) 0.034(2) 0.049(3) 0.009(2) -0.002(2) 0.0038(18) 
C20 0.035(3) 0.029(2) 0.042(3) 0.009(2) 0.009(2) 0.0083(19) 
C21 0.041(3) 0.032(2) 0.029(2) 0.0006(18) 0.006(2) 0.011(2) 
C22 0.031(2) 0.038(2) 0.028(2) -0.0012(19) -0.0024(18) 0.0031(19) 
_refine_ls_extinction_method 
    'None'
loop_
 _geom_bond_atom_site_label_1
 _geom_bond_site_symmetry_1
 _geom_bond_atom_site_label_2
 _geom_bond_site_symmetry_2
 _geom_bond_distance
 _geom_bond_publ_flag
Os1 . N2 . 1.881(4)    yes
Os1 . N1 . 1.883(4)    yes
Os1 . O2 . 1.724(4)    yes
Os1 . O1 . 1.722(3)    yes
N1 . C3 . 1.501(5)    yes
N1 . C1 . 1.480(5)    yes
C1 . H11 . 1.000    no
C1 . C7 . 1.536(6)    yes
C1 . C2 . 1.531(6)    yes
C2 . H21 . 1.000    no
C2 . C17 . 1.519(6)    yes
C2 . N2 . 1.478(5)    yes
N2 . C13 . 1.503(6)    yes
C3 . C6 . 1.525(6)    yes
C3 . C5 . 1.518(6)    yes
C3 . C4 . 1.535(7)    yes
C4 . H43 . 1.000    no
C4 . H42 . 1.000    no
C4 . H41 . 1.000    no
C5 . H53 . 1.000    no
C5 . H52 . 1.000    no
C5 . H51 . 1.000    no
C6 . H63 . 1.000    no
C6 . H62 . 1.000    no
C6 . H61 . 1.000    no
C7 . C12 . 1.389(7)    yes
C7 . C8 . 1.391(7)    yes
C8 . H81 . 1.000    no
C8 . C9 . 1.399(7)    yes
C9 . H91 . 1.000    no
C9 . C10 . 1.387(9)    yes
C10 . H101 . 1.000    no
C10 . C11 . 1.366(9)    yes
C11 . H111 . 1.000    no
C11 . C12 . 1.390(7)    yes
C12 . H121 . 1.000    no
C13 . C16 . 1.515(7)    yes
C13 . C15 . 1.513(7)    yes
C13 . C14 . 1.526(7)    yes
C14 . H143 . 1.000    no
C14 . H142 . 1.000    no
C14 . H141 . 1.000    no
C15 . H153 . 1.000    no
C15 . H152 . 1.000    no
C15 . H151 . 1.000    no
C16 . H163 . 1.000    no
C16 . H162 . 1.000    no
C16 . H161 . 1.000    no
C17 . C22 . 1.395(6)    yes
C17 . C18 . 1.400(6)    yes
C18 . H181 . 1.000    no
C18 . C19 . 1.379(7)    yes
C19 . H191 . 1.000    no
C19 . C20 . 1.393(7)    yes
C20 . H201 . 1.000    no
C20 . C21 . 1.380(7)    yes
C21 . H211 . 1.000    no
C21 . C22 . 1.389(7)    yes
C22 . H221 . 1.000    no
loop_
 _geom_angle_atom_site_label_1
 _geom_angle_site_symmetry_1
 _geom_angle_atom_site_label_2
 _geom_angle_site_symmetry_2
 _geom_angle_atom_site_label_3
 _geom_angle_site_symmetry_3
 _geom_angle
 _geom_angle_publ_flag
N2 . Os1 . N1 . 82.29(16)    yes
N2 . Os1 . O2 . 109.76(17)    yes
N1 . Os1 . O2 . 113.50(16)    yes
N2 . Os1 . O1 . 114.26(17)    yes
N1 . Os1 . O1 . 109.94(16)    yes
O2 . Os1 . O1 . 120.76(17)    yes
C3 . N1 . C1 . 117.6(3)    yes
C3 . N1 . Os1 . 125.1(3)    yes
C1 . N1 . Os1 . 117.1(3)    yes
H11 . C1 . C7 . 104.109    no
H11 . C1 . C2 . 111.877    no
C7 . C1 . C2 . 111.8(4)    yes
H11 . C1 . N1 . 110.514    no
C7 . C1 . N1 . 113.1(3)    yes
C2 . C1 . N1 . 105.6(3)    yes
H21 . C2 . C17 . 103.884    no
H21 . C2 . N2 . 109.273    no
C17 . C2 . N2 . 114.5(4)    yes
H21 . C2 . C1 . 113.142    no
C17 . C2 . C1 . 110.7(3)    yes
N2 . C2 . C1 . 105.5(3)    yes
C13 . N2 . Os1 . 124.3(3)    yes
C13 . N2 . C2 . 118.0(3)    yes
Os1 . N2 . C2 . 117.7(3)    yes
C6 . C3 . C5 . 109.4(4)    yes
C6 . C3 . C4 . 110.2(4)    yes
C5 . C3 . C4 . 108.6(4)    yes
C6 . C3 . N1 . 107.6(3)    yes
C5 . C3 . N1 . 109.6(3)    yes
C4 . C3 . N1 . 111.3(4)    yes
H43 . C4 . H42 . 109.476    no
H43 . C4 . H41 . 109.477    no
H42 . C4 . H41 . 109.475    no
H43 . C4 . C3 . 109.467    no
H42 . C4 . C3 . 109.466    no
H41 . C4 . C3 . 109.467    no
H53 . C5 . H52 . 109.476    no
H53 . C5 . H51 . 109.476    no
H52 . C5 . H51 . 109.476    no
H53 . C5 . C3 . 109.467    no
H52 . C5 . C3 . 109.467    no
H51 . C5 . C3 . 109.466    no
H63 . C6 . H62 . 109.476    no
H63 . C6 . H61 . 109.476    no
H62 . C6 . H61 . 109.475    no
H63 . C6 . C3 . 109.467    no
H62 . C6 . C3 . 109.467    no
H61 . C6 . C3 . 109.467    no
C12 . C7 . C8 . 119.1(4)    yes
C12 . C7 . C1 . 123.1(4)    yes
C8 . C7 . C1 . 117.8(4)    yes
H81 . C8 . C9 . 119.882    no
H81 . C8 . C7 . 119.883    no
C9 . C8 . C7 . 120.2(5)    yes
H91 . C9 . C10 . 119.949    no
H91 . C9 . C8 . 119.949    no
C10 . C9 . C8 . 120.1(5)    yes
H101 . C10 . C11 . 120.403    no
H101 . C10 . C9 . 120.402    no
C11 . C10 . C9 . 119.2(5)    yes
H111 . C11 . C12 . 119.179    no
H111 . C11 . C10 . 119.180    no
C12 . C11 . C10 . 121.6(5)    yes
H121 . C12 . C7 . 120.149    no
H121 . C12 . C11 . 120.149    no
C7 . C12 . C11 . 119.7(5)    yes
C16 . C13 . C15 . 110.9(5)    yes
C16 . C13 . C14 . 110.1(6)    yes
C15 . C13 . C14 . 107.4(5)    yes
C16 . C13 . N2 . 108.4(4)    yes
C15 . C13 . N2 . 110.0(4)    yes
C14 . C13 . N2 . 110.1(4)    yes
H143 . C14 . H142 . 109.476    no
H143 . C14 . H141 . 109.477    no
H142 . C14 . H141 . 109.476    no
H143 . C14 . C13 . 109.466    no
H142 . C14 . C13 . 109.465    no
H141 . C14 . C13 . 109.466    no
H153 . C15 . H152 . 109.476    no
H153 . C15 . H151 . 109.475    no
H152 . C15 . H151 . 109.476    no
H153 . C15 . C13 . 109.466    no
H152 . C15 . C13 . 109.467    no
H151 . C15 . C13 . 109.467    no
H163 . C16 . H162 . 109.477    no
H163 . C16 . H161 . 109.477    no
H162 . C16 . H161 . 109.475    no
H163 . C16 . C13 . 109.467    no
H162 . C16 . C13 . 109.466    no
H161 . C16 . C13 . 109.466    no
C22 . C17 . C18 . 117.8(4)    yes
C22 . C17 . C2 . 123.7(4)    yes
C18 . C17 . C2 . 118.2(4)    yes
H181 . C18 . C19 . 119.243    no
H181 . C18 . C17 . 119.243    no
C19 . C18 . C17 . 121.5(4)    yes
H191 . C19 . C20 . 119.950    no
H191 . C19 . C18 . 119.950    no
C20 . C19 . C18 . 120.1(4)    yes
H201 . C20 . C21 . 120.496    no
H201 . C20 . C19 . 120.496    no
C21 . C20 . C19 . 119.0(4)    yes
H211 . C21 . C22 . 119.488    no
H211 . C21 . C20 . 119.488    no
C22 . C21 . C20 . 121.0(4)    yes
H221 . C22 . C21 . 119.735    no
H221 . C22 . C17 . 119.734    no
C21 . C22 . C17 . 120.5(4)    yes
